# Supplementary material
Source: PubMed Central journal article supplement (PMC3010149)

SUPPLEMENTAL FIGURE - 1

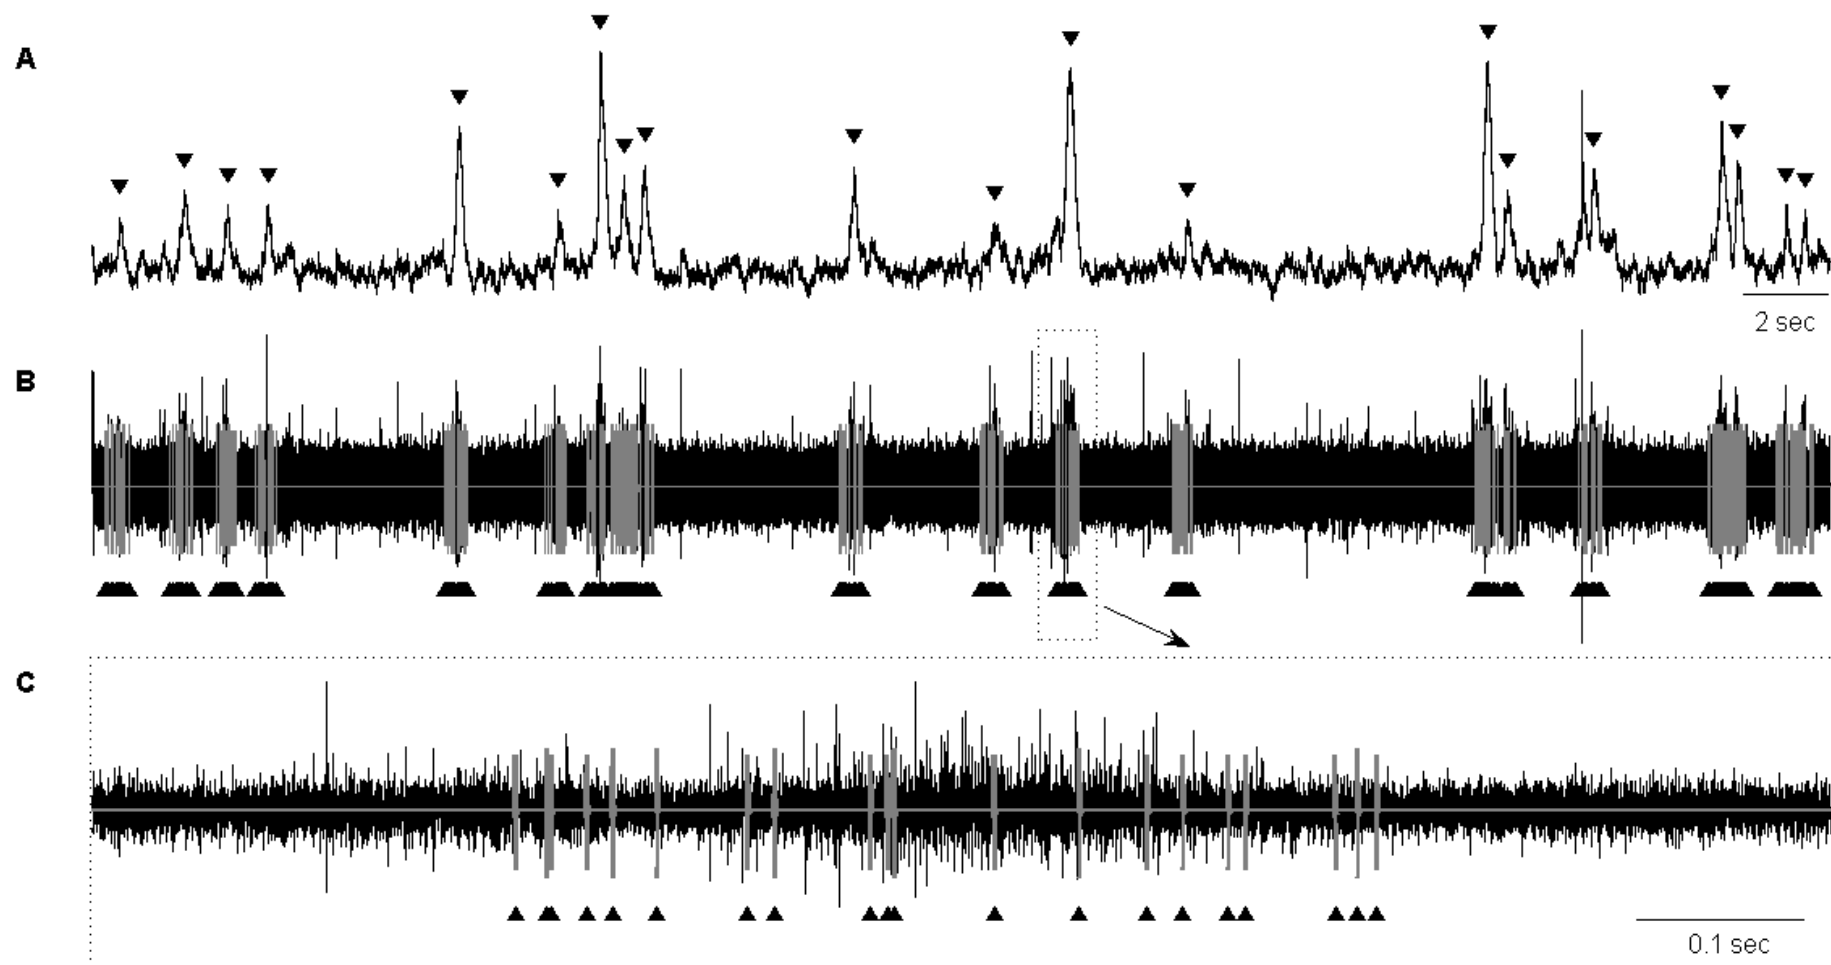

SUPPLEMENTAL FIGURE - 2

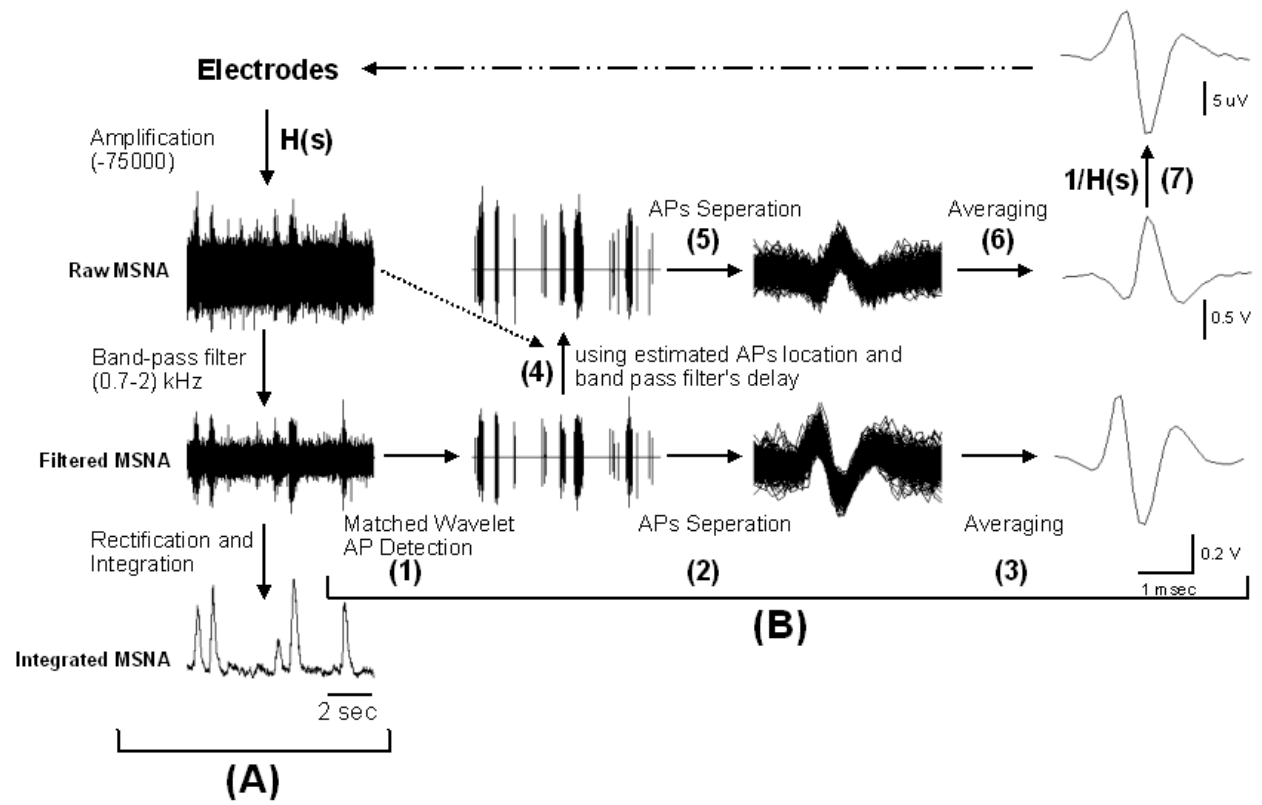

Supplement: tjp0588-4825-SD1.pdf [file tjp0588-4825-SD1.pdf]
